# Supplementary material for: Strategies for Introducing Wolbachia to Reduce Transmission of Mosquito-Borne Diseases
Source: PubMed Central journal article supplement (PMC3082501; doi:10.1371/journal.pntd.0001024), 2011-04-26
Supplement: pntd.0001024.s003.pdf [file pntd.0001024.s003.pdf]

# Strategies for introducing *Wolbachia* to reduce transmission of mosquito-borne diseases

Penelope A. Hancock, Steven P. Sinkins & H. Charles J. Godfray

## Text S3: Modelling adult age-dependent mortality

Similar to Hancock et al. [21], age-dependent mortality in adult mosquitoes is modelled using a Weibull function. Adults are also assumed to experience a ‘background’ risk of mortality that is independent of age. In mosquitoes uninfected with *Wolbachia*, adult survival to age  $a$  is given by

$$\theta_{A,U}(a) = \exp\left(-\int_0^a \mu_{A,U}(\tau) d\tau\right); \quad \mu_{A,U}(a) = c_U + \gamma_U r_U (r_U a_U)^{\gamma_U - 1} \quad (\text{C1})$$

where  $\mu_{A,U}(a)$  is the daily rate of adult mortality,  $c_U$  is a constant term representing age-independent mortality and  $\gamma_U$  and  $r_U$  are the shape and rate parameters of the Weibull function representing age-dependent mortality. Mortality in adult mosquitoes infected with *Wolbachia* is described by the same function with different parameters, replacing the subscript  $U$  with subscript  $W$ .

### Parameterising adult age-dependent mortality

We use laboratory survival data for *Anopheles stephensi* [23] to estimate the parameters of the Weibull function describing age-dependent adult mortality in mosquitoes uninfected with *Wolbachia*,  $\gamma_U$  and  $r_U$  (eqn C1). To incorporate the additional mortality experienced by mosquitoes in nature, we set the constant term  $c_U$  in eqn (C1) to a value typically recorded for field populations of *Anopheles* (Table 1).

We use data from laboratory colonies of *Aedes aegypti* infected with the life-shortening *Wolbachia* strain *wMelPop* to estimate the effect of *Wolbachia* infection on adult mortality [6]. For a given value of the Weibull shape parameter ( $\gamma_U = \gamma_W$ ) we found that the effect of *wMelPop* infection on adult survival could be well-approximated by doubling the Weibull rate parameter ( $r_W = 2 r_U$ ) (Table 1). Both infected and uninfected adults are assumed to experience the same risk of ‘background’ age-independent mortality ( $c_U = c_W$ ).
